# Supplementary material
Source: Springer Nature journal article supplement (https://www.springermedizin.de/resource/supplementary/12937_2007_156_MOESM1_ESM.pdf/25654516)
Supplement: MOESM1 [file 25654516]

Screening by MNA-sf  
Or recent weight loss >10%  
**589**

Entered the study  
At-risk/malnourished  
**259 (43.97%)**

Not entered the study  
Well nourished  
**330 (56.03%)**

Full MNA

At risk  
(MNA 17-23.5)  
**211 (81.5%)**

Malnourished  
(MNA < 17)  
**48 (18.5%)**
